# Supplementary material for: Growth Hormone Secretory Capacity Is Associated with Cardiac Morphology and Function in Overweight and Obese Patients: A Controlled, Cross-Sectional Study
Source: MDPI journal article supplement (doi:10.3390/cells11152420), 2022-08-04
Supplement: s1 [file s1]

## Supplementary data

**Table S1.** General characteristics and anthropometric parameters of study population

|                          | Mean $\pm$ SD      |
|--------------------------|--------------------|
| Age (years)              | 46.18 $\pm$ 12.78  |
| BMI (kg/m <sup>2</sup> ) | 38.71 $\pm$ 7.88   |
| Waist circumference (cm) | 119.63 $\pm$ 17.42 |
| Hip circumference (cm)   | 122.00 $\pm$ 14.38 |
| WHR                      | 0.96 $\pm$ 0.09    |
| FM %                     | 40.52 $\pm$ 6.68   |
| TF (kg)                  | 19.22 $\pm$ 6.10   |
| TF %                     | 38.90 $\pm$ 6.98   |
| UFDI                     | 1.87 $\pm$ 0.57    |
| ASMM/weight              | 0.25 $\pm$ 0.03    |

BMI = Body Mass Index; WHR = Waist-to-Hip Ratio; FM = Fat Mass; TF = Trunk Fat; UFDI = Upper body fat deposition index. ASMM = appendicular skeletal muscle mass

**Table S2.** Metabolic Parameters of our population.

|                           | Mean $\pm$ SD       |
|---------------------------|---------------------|
| Fasting glucose (mg/dl)   | 97.73 $\pm$ 18.56   |
| Basal Insulinemia (UI/L)  | 20.62 $\pm$ 19.49   |
| Glycated hemoglobin %     | 5.68 $\pm$ 0.74     |
| HOMA-IR                   | 5.26 $\pm$ 5.67     |
| Triglycerides (mg/dl)     | 137.82 $\pm$ 106.95 |
| HDL (mg/dl)               | 49.09 $\pm$ 12.82   |
| LDL (mg/dl)               | 118.95 $\pm$ 33.50  |
| Total Cholesterol (mg/dl) | 195.10 $\pm$ 36.99  |
| CRP (mg/L)                | 0.65 $\pm$ 0.57     |
| Systolic BP (mmHg)        | 129.87 $\pm$ 17.59  |
| Diastolic BP (mmHg)       | 81.58 $\pm$ 11.73   |

HOMA-IR = HOmeostatic Model Assessment of Insulin Resistance; HDL = High Density Lipoproteins; LDL = Low Density Lipoproteins; CRP = C-Reactive Protein; BP = Blood Pressure.

**Table S3.** Echocardiographic Parameters of our population.

|                          | Mean $\pm$ SD      |
|--------------------------|--------------------|
| EF %                     | 64.79 $\pm$ 4.83   |
| E/A                      | 1.06 $\pm$ 0.26    |
| cFS %                    | 38.60 $\pm$ 3.50   |
| EFT (mm)                 | 8.30 $\pm$ 1.19    |
| LVMI (g/m <sup>2</sup> ) | 111.28 $\pm$ 25.39 |
| IVS (mm)                 | 10.85 $\pm$ 1.53   |
| LVPW (mm)                | 10.11 $\pm$ 3.01   |
| LV EDD (mm)              | 49.99 $\pm$ 4.73   |
| LV ESD (mm)              | 30.68 $\pm$ 3.94   |
| LA (mm)                  | 28.69 $\pm$ 4.18   |

EF = Ejection Fraction; E/A = ratio between E wave and A wave; cFS = circumferential Fractional Shortening; EFT = Epicardial Fat Thickness; LVMI = Left Ventricular Mass index; IVS = Inter Ventricular Septal dimension; LVPW = Left Ventricular Posterior Wall; LV EDD = Left Ventricular End Diastolic Diameter; LV ESD = Left Ventricular End Systolic Diameter; LA = Left Atrium.
